# Supplementary material for: Precise control over gas-transporting channels in zeolitic imidazolate framework glasses
Source: PubMed Central journal article supplement (PMC10837076; doi:10.1038/s41563-023-01738-3), 2023-12-20
Supplement: 41563_2023_1738_MOESM1_ESM.pdf [file 41563_2023_1738_MOESM1_ESM.pdf]

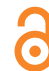

---

# Precise control over gas-transporting channels in zeolitic imidazolate framework glasses

---

In the format provided by the authors and unedited

---

**This PDF file includes:**

Materials  
Supplementary Text  
Figs. S1 to S29  
Table S1  
Captions for Videos S1 to S5  
Captions for Extended Data figures S1 to S2

**Other Supplementary Information for this manuscript include the following:**

Videos S1 to S5  
Extended data figures 1 to 2

## Materials

Zinc nitrate hexahydrate ( $\geq 99\%$ ) and cobalt (II) nitrate hexahydrate ( $\geq 99\%$ ) were purchased from ABCR. Benzimidazole ( $\geq 99\%$ ) was supplied by Alfa Aesar and Imidazole ( $\geq 99.5\%$ ) was purchased from Sigma-Aldrich. N,N-Dimethylformamide ( $\geq 99.9\%$ ) was supplied by VWR, dichloromethane ( $\geq 99\%$ , stabilized with ethanol) and toluene ( $\geq 99.8\%$ ) – by Acros Organics.

## Supplementary Text

### Volume loss calculations

For the series of  $a_g\text{ZIF-62}_P$  samples its volume loss while tempering ( $a_g\text{ZIF-62}_{P\rightarrow T}$ ) was calculated geometrically. Approximate area of the surface was multiplied by the sample's thickness. Parameters for these calculations were obtained from a built-in software of the microscope (**Fig. S12 to S16**). The thickness of each sample before and after tempering was measured separately. The errors are non-sampling and were assumed based on the numbers of surface defects for each sample individually (**Table S1**).

### Diffusion coefficients calculation

The obtained uptake curves in diffusion measurements were fitted with the following solutions of Fick's second law of diffusion, assuming that the uptake is solely diffusion-limited, in order to calculate the diffusion coefficients  $D$ :

For spherical sample,

$$\frac{m(t)}{m(\infty)} = 1 - \frac{6}{\pi^2} \sum_{n=1}^{\infty} \frac{1}{n^2} \exp\left(\frac{-Dn^2\pi^2 t}{r^2}\right)$$

where  $m(t)$  and  $m(\infty)$  are amounts of guest molecules at time  $t$  and in equilibrium, respectively.  $D$  is diffusion coefficient and  $r$  is radius of the spherical sample.

For 1D plane-parallel sample,

$$\frac{m(t)}{m(\infty)} = 1 - \frac{8}{\pi^2} \sum_{n=0}^{\infty} \frac{1}{(2n+1)^2} \exp\left(\frac{-D(2n+1)^2\pi^2 t}{L^2}\right)$$

where  $L$  thickness of the sample.

For the sake of simplicity, ZIF-62(Zn),  $a_g\text{ZIF-62}_{nP}$  and  $a_g\text{ZIF-62}_{nP\rightarrow T}$  were assumed to be spherical. On the other hand,  $a_g\text{ZIF-62}_P$  and  $a_g\text{ZIF-62}_{P\rightarrow T}$  were assumed to be 1D plane-parallel since the diffusion measurements were measured at the center of the pressed glass pieces and, considering relatively slow diffusion of guest molecules in those glasses, the influence of the molecules diffusing from the four sides would be negligible. The calculated diffusion coefficients are shown in **Table 1** in the main text.

**Fig. S1.**

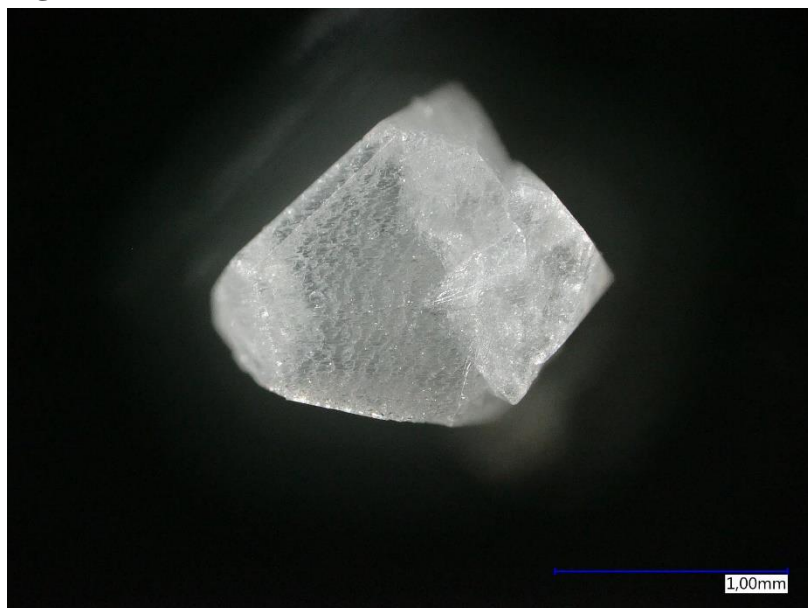

Microscope photograph of a large ZIF-62(Zn) crystal.

**Fig. S2.**

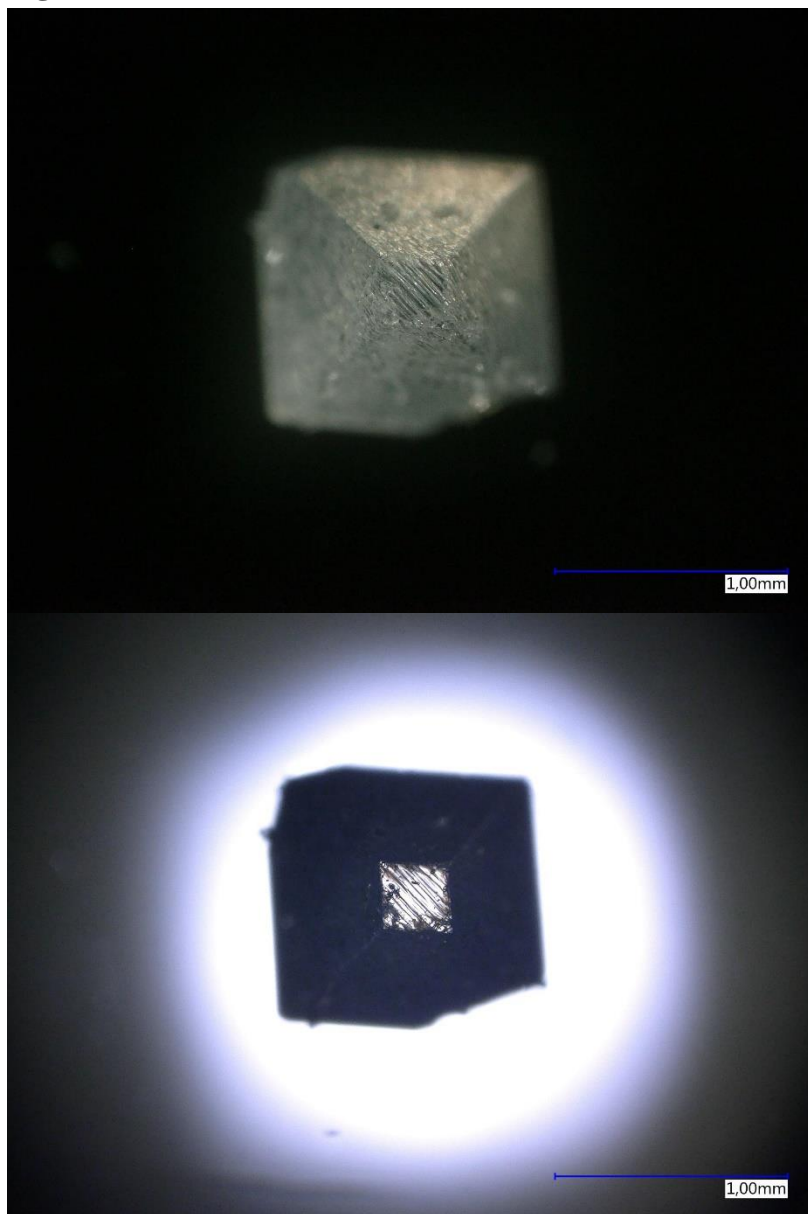

Microscope photographs of ZIF-62(Zn) crystal with different light modes demonstrating its transparency.

**Fig. S3.**

ZIF-62

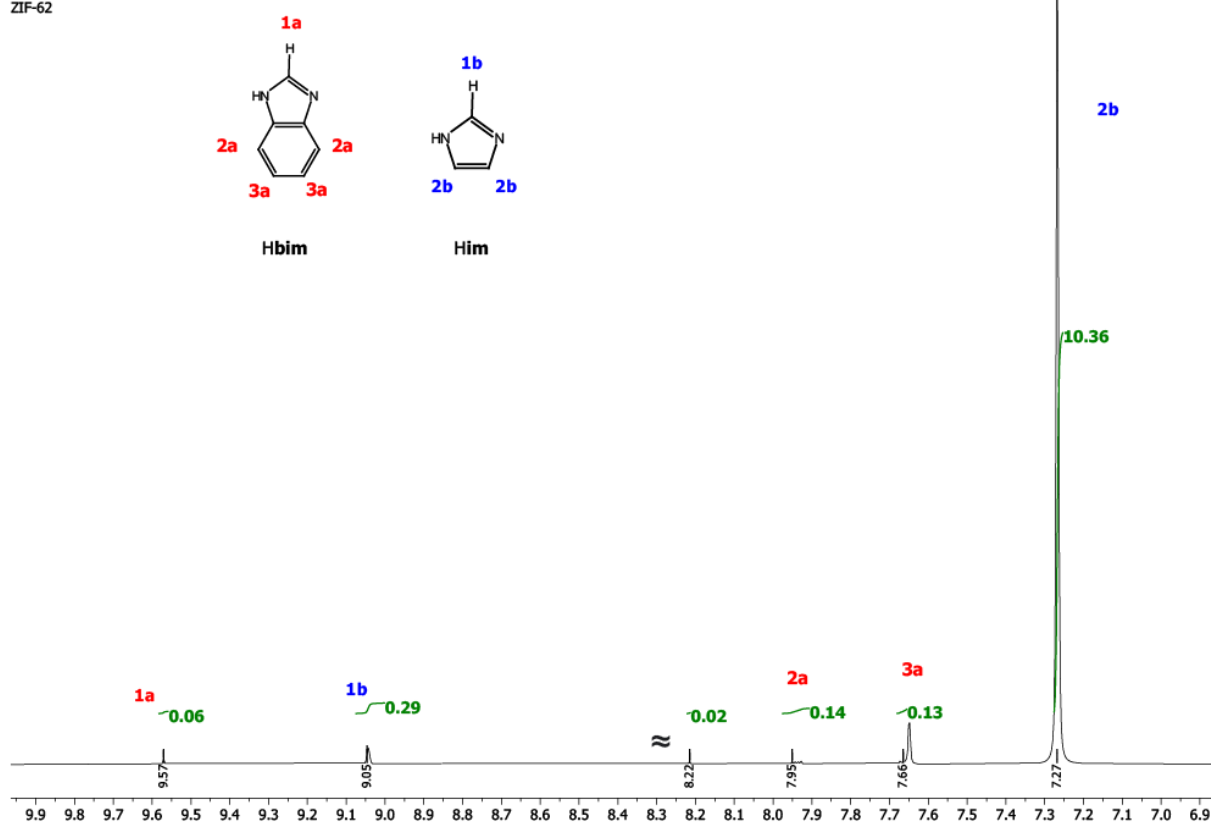

<sup>1</sup>H NMR spectra of ZIF-62(Zn). δH (500 MHz; DCI (20%)/D<sub>2</sub>O (0.889 mL) and DMSO-d<sub>6</sub> (3 mL); Me<sub>4</sub>Si), 9.57 (1H, s, H<sub>b</sub>), 9.05 (1H, s, H<sub>a</sub>), 2.67 (DMSO), 0.00 (TMS).

**Fig. S4.**

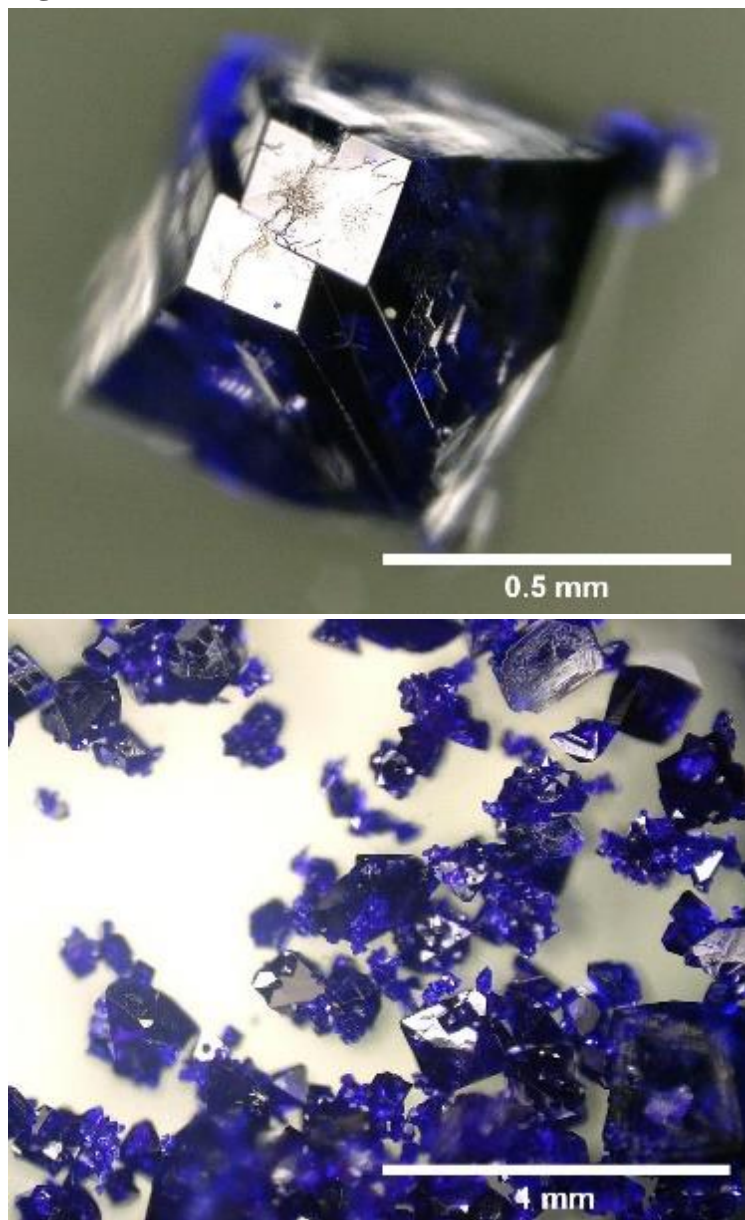

Microscope photographs of crystalline ZIF-62(Co).

**Fig. S5.**

ZIF-62 (Co)

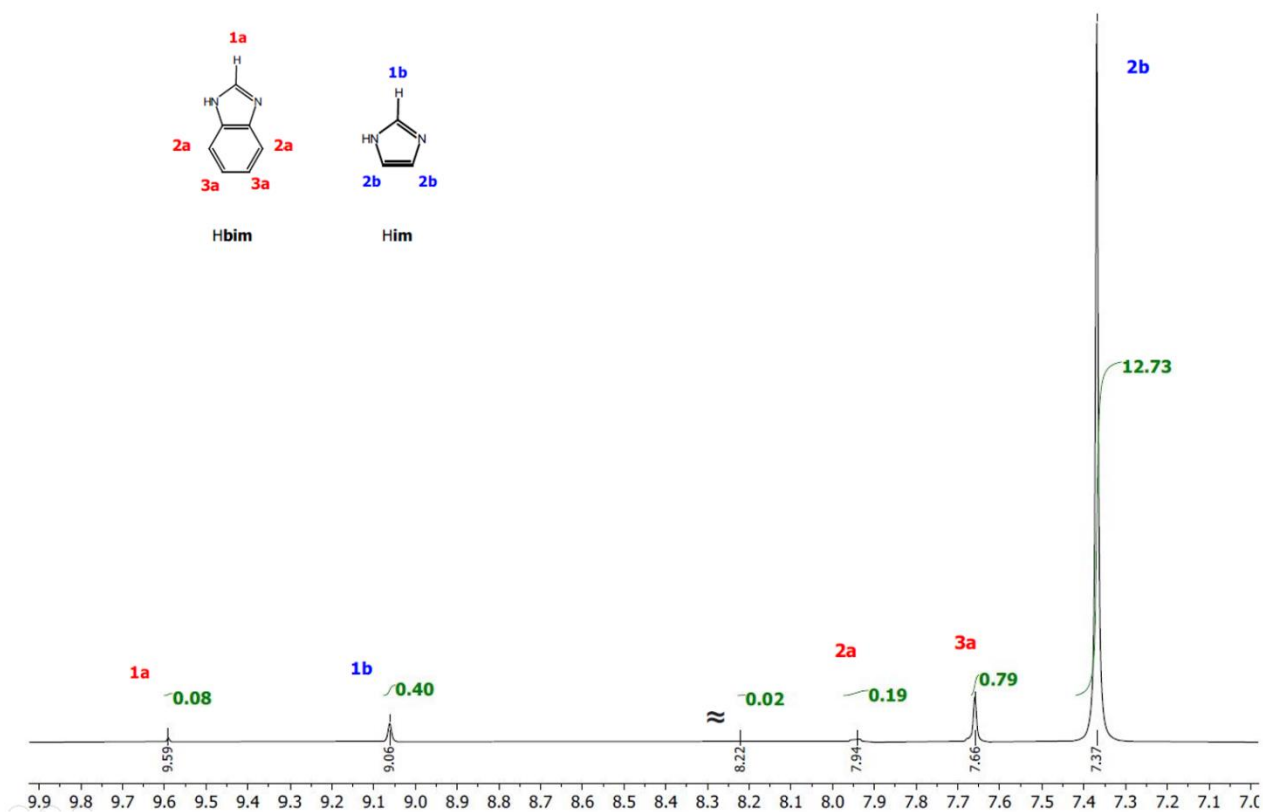

<sup>1</sup>H NMR spectra of ZIF-62(Co).  $\delta$ H (500 MHz; DCI (20%)/D<sub>2</sub>O (0.889 mL) and DMSO-d<sub>6</sub> (3 mL); Me<sub>4</sub>Si), 9.58 (1H, s, H<sub>b</sub>), 9.05 (1H, s, H<sub>a</sub>), 2.67 (DMSO), 0.00 (TMS).



Fig. S6.

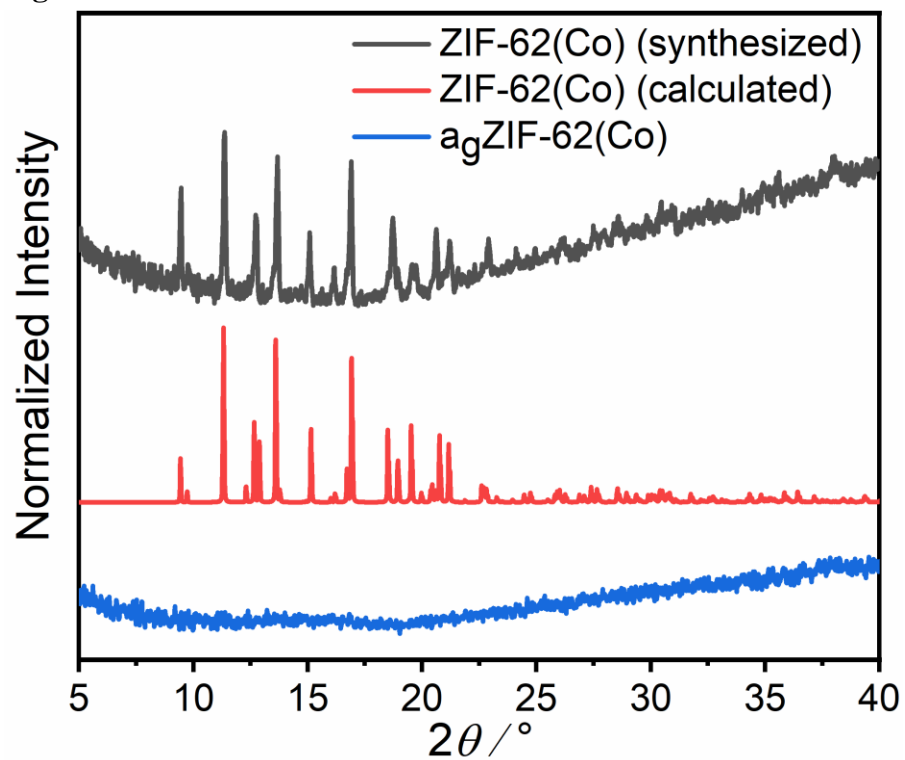

PXRD of the phase-pure ZIF-62(Co) and agZIF-62(Co) with corresponding calculated pattern. The background appearance is caused by the fluorescence background correction for the cobalt containing samples.

Fig. S7.

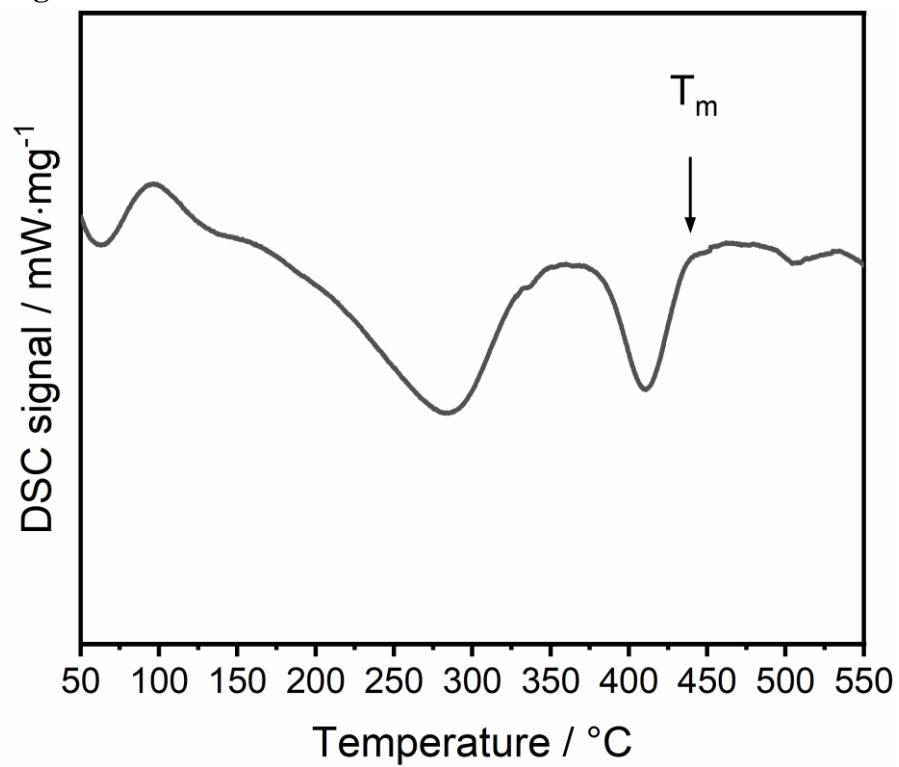

DSC measurement for ZIF-62(Co).

**Fig. S8.**

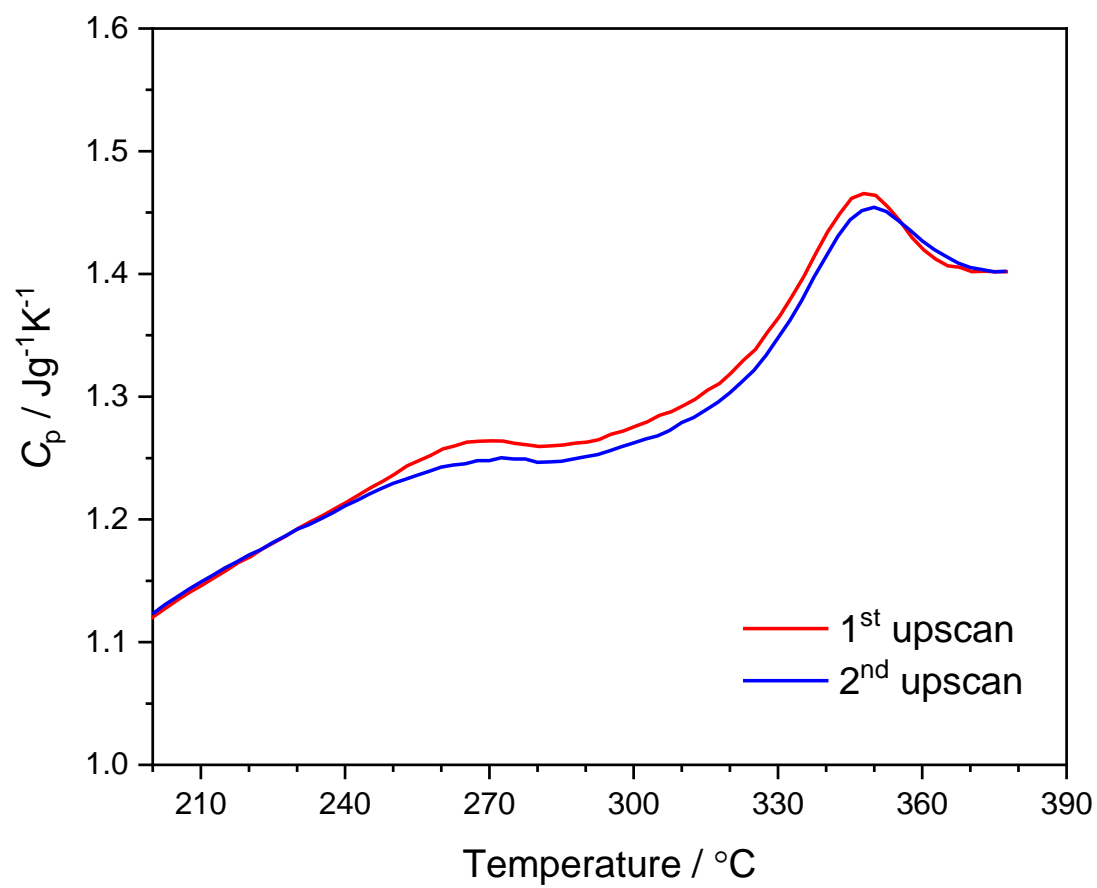

Cyclic  $C_p$  scan of ZIF-62(Co).

**Fig. S9.**

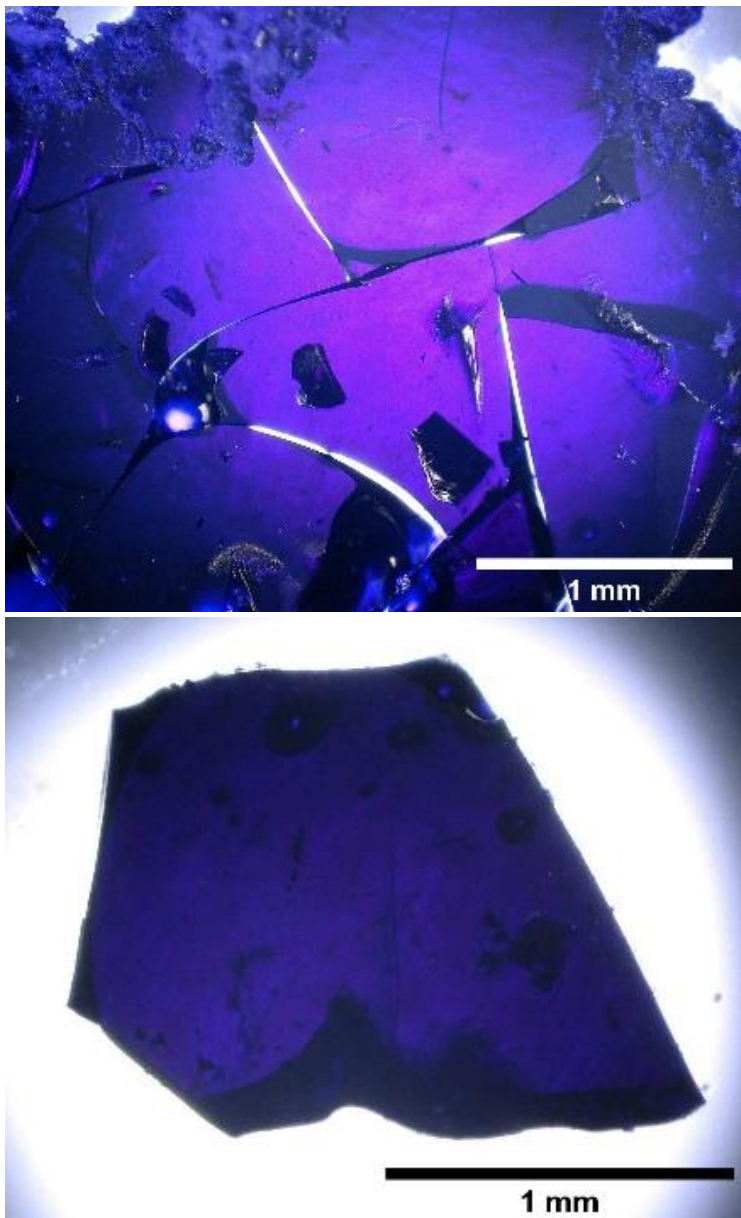

Microscope photographs of ZIF-62(Co) pressed glass.

**Fig. S10.**

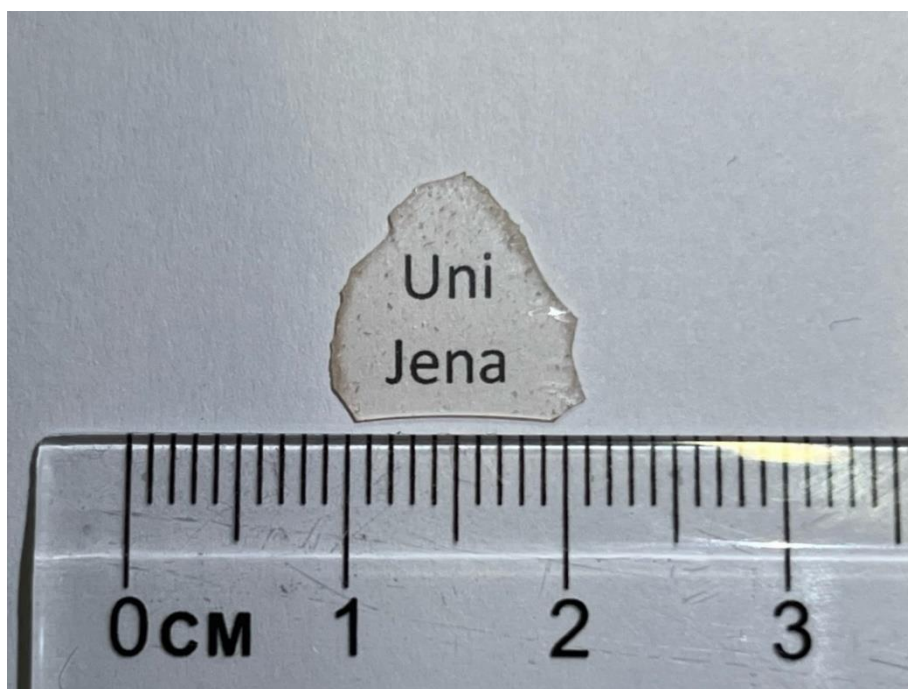

Demonstration of a larger  $a_g\text{ZIF-62p}(\text{Zn})$  piece.

**Fig. S11.**

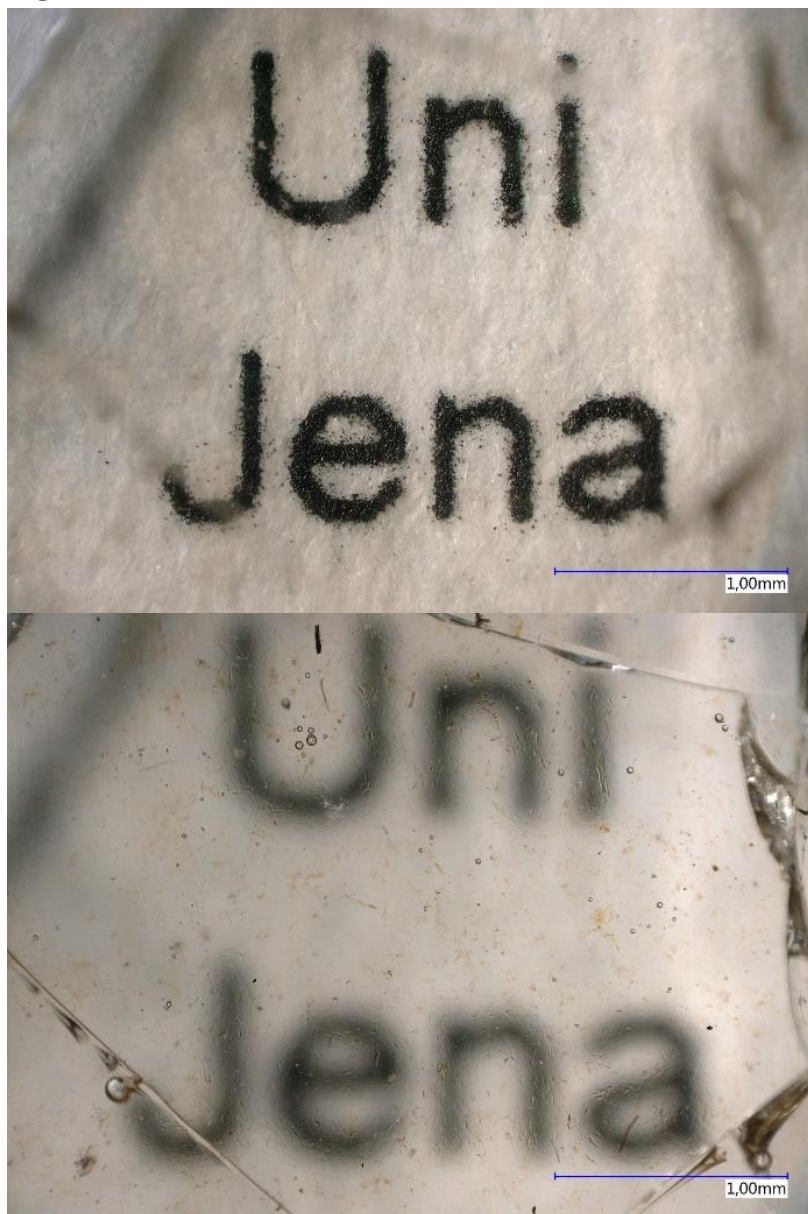

Demonstration of a transparency of  $a_g\text{ZIF-62P}(\text{Zn})$ : microscope photographs of the clearly visible through the sample inscription with a focus on the inscription (top) and glass (bottom).

Fig. S12.

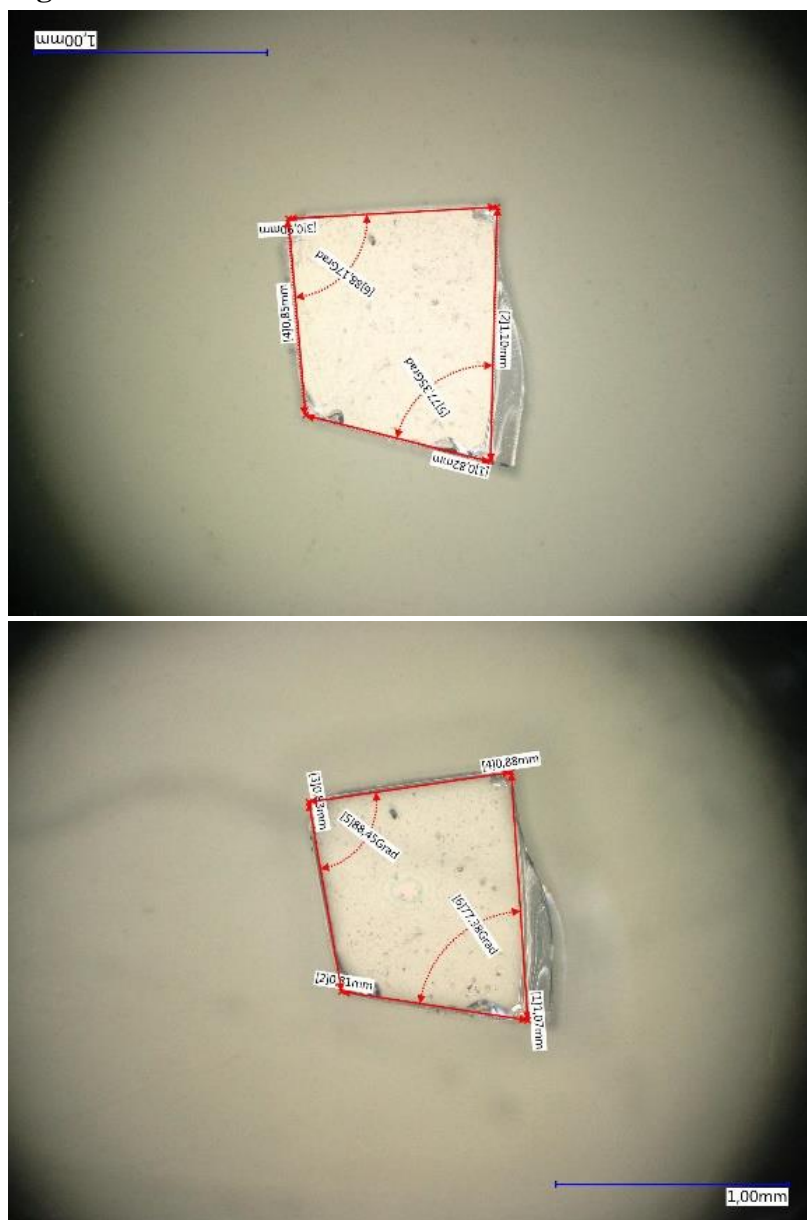

$a_g\text{ZIF-62}_P$  (top) and  $a_g\text{ZIF-62}_{P\rightarrow T}$  (bottom) with tempering time of 10 minutes and the geometrical parameters required for the area determination, obtained from the built-in microscope software.



**Fig. S13.**

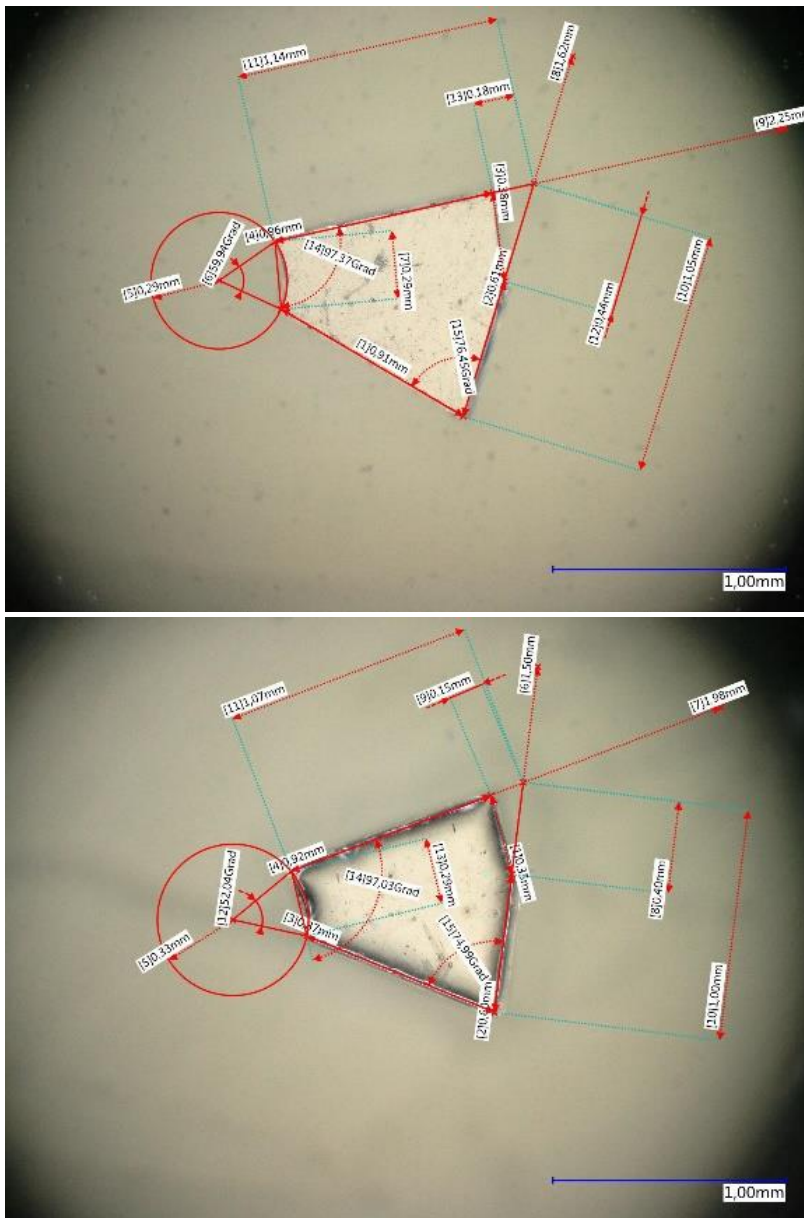

$agZIF-62_P$  (top) and  $agZIF-62_{P \rightarrow T}$  (bottom) with tempering time of 30 minutes and the geometrical parameters required for the area determination, obtained from the built-in microscope software.



Fig. S14.

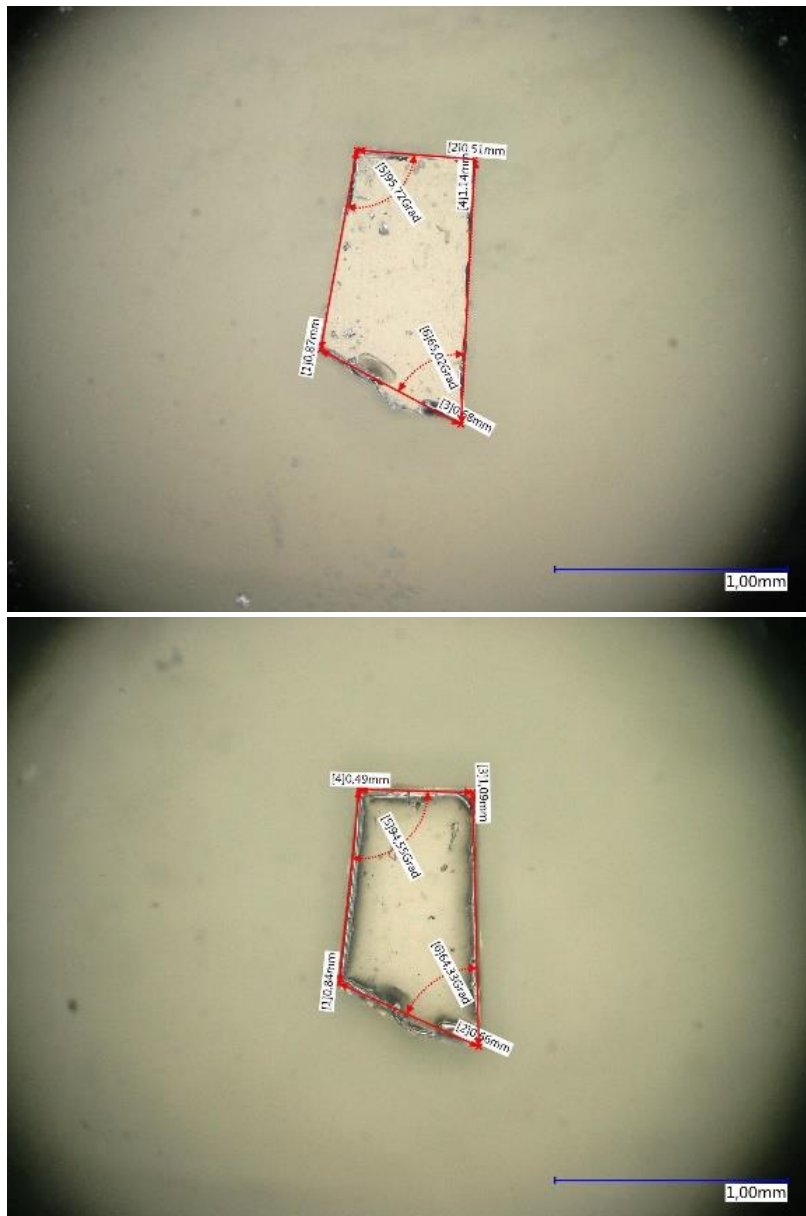

$agZIF-62_P$  (top) and  $agZIF-62_{P \rightarrow T}$  (bottom) with tempering time of 60 minutes and the geometrical parameters required for the area determination, obtained from the built-in microscope software.

Fig. S15.

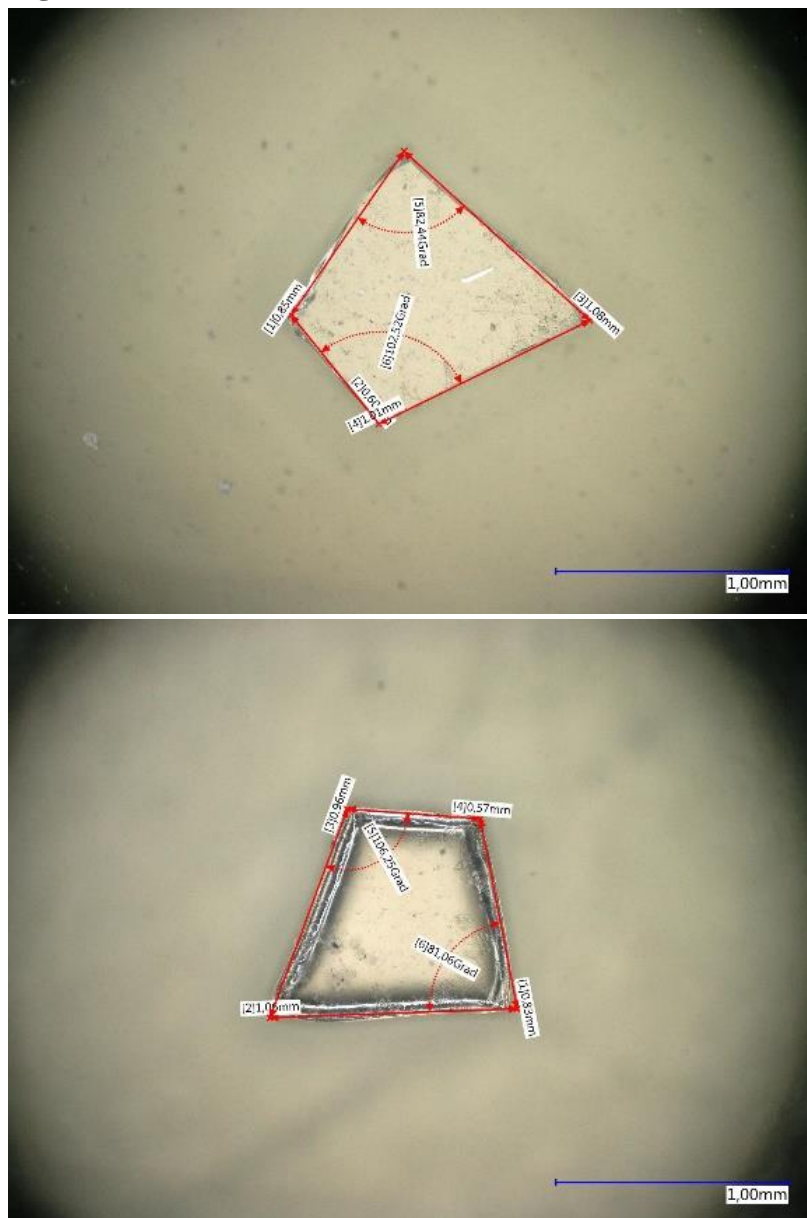

$a_g\text{ZIF-62}_P$  (top) and  $a_g\text{ZIF-62}_{P\rightarrow T}$  (bottom) with tempering time of 120 minutes and the geometrical parameters required for the area determination, obtained from the built-in microscope software.

**Fig. S16.**

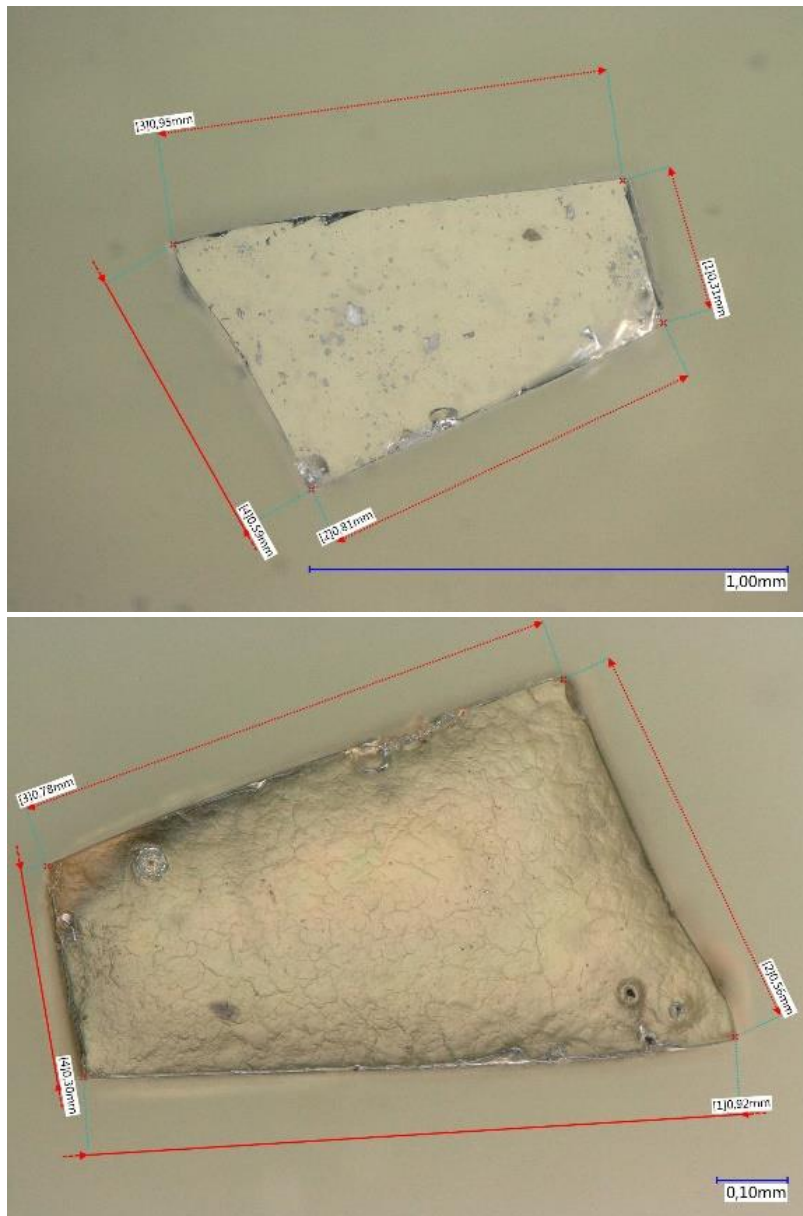

$a_g\text{ZIF-62}_P$  (top) and  $a_g\text{ZIF-62}_{P \rightarrow T}$  (bottom) with tempering time of 240 minutes and the geometrical parameters required for the area determination, obtained from the built-in microscope software.

Fig. S17.

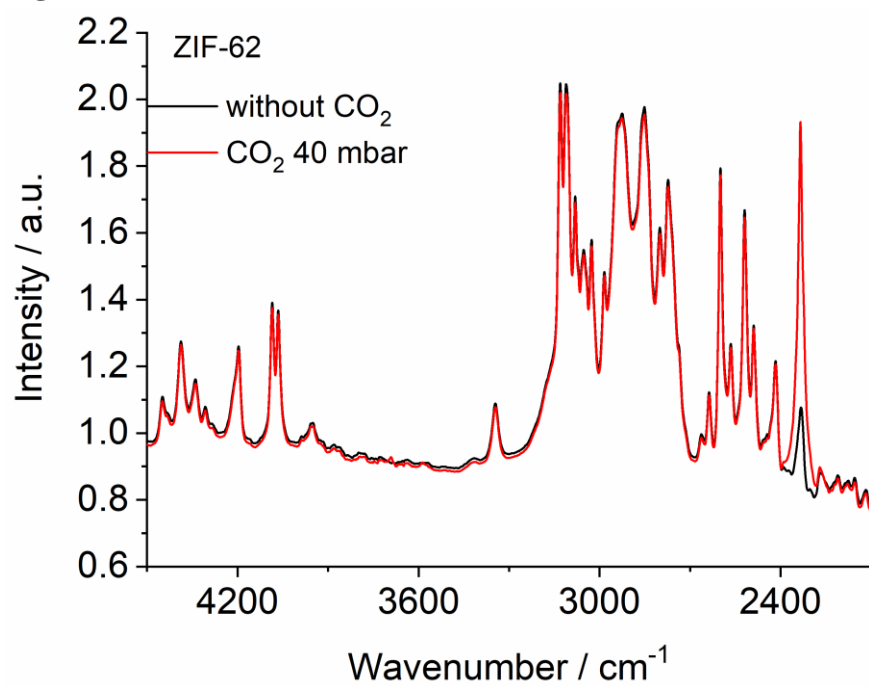

IR spectrum of ZIF-62 with and without CO<sub>2</sub> in the cell.

**Fig. S18.**

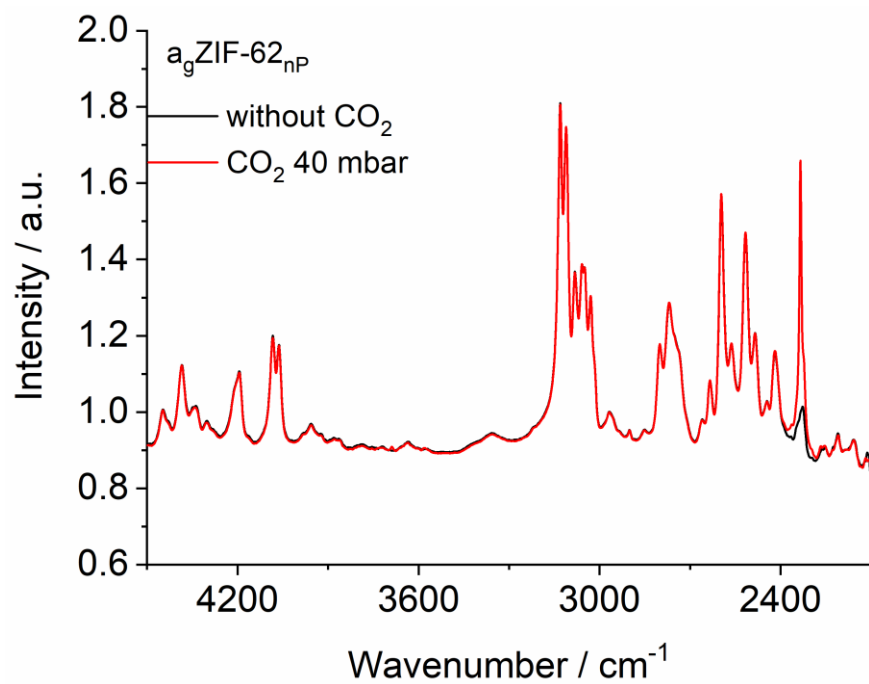

IR spectrum of  $a_g\text{ZIF-62}_{nP}$  with and without  $\text{CO}_2$  in the cell.

**Fig. S19.**

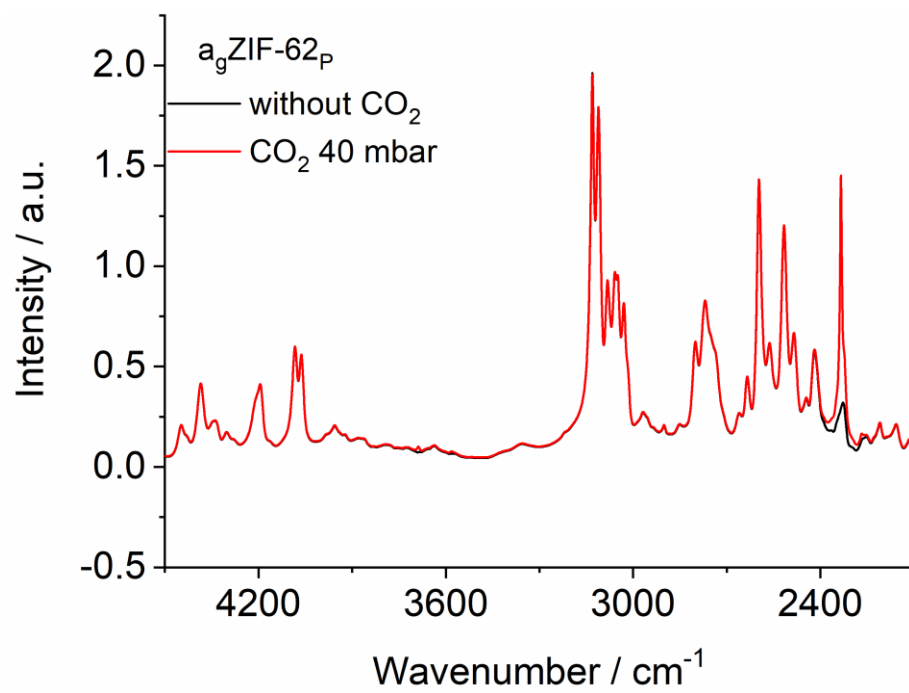

IR spectrum of  $a_g\text{ZIF-62}_p$  with and without  $\text{CO}_2$  in the cell.

**Fig. S20.**

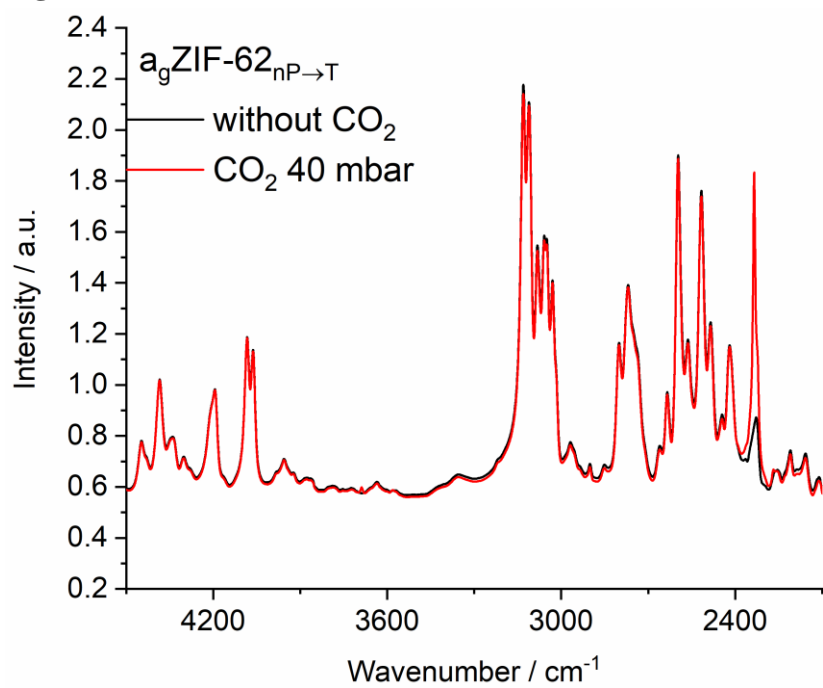

IR spectrum of  $a_g\text{ZIF-62}_{nP \rightarrow T}$  with and without  $\text{CO}_2$  in the cell.

Fig. S21.

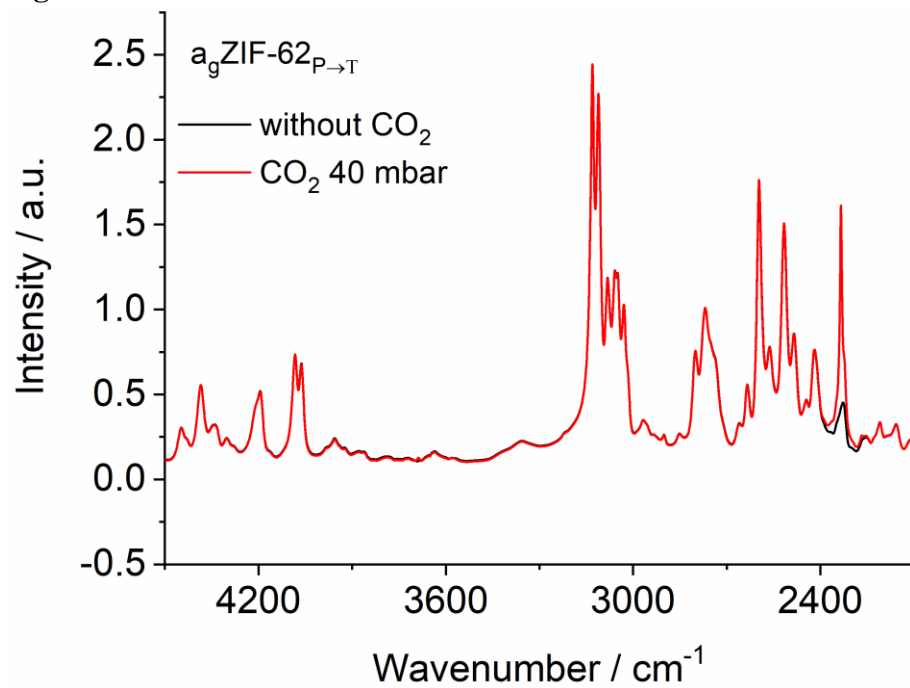

IR spectrum of  $a_g\text{ZIF-62}_{P \rightarrow T}$  with and without  $\text{CO}_2$  in the cell.



**Fig. S22.**

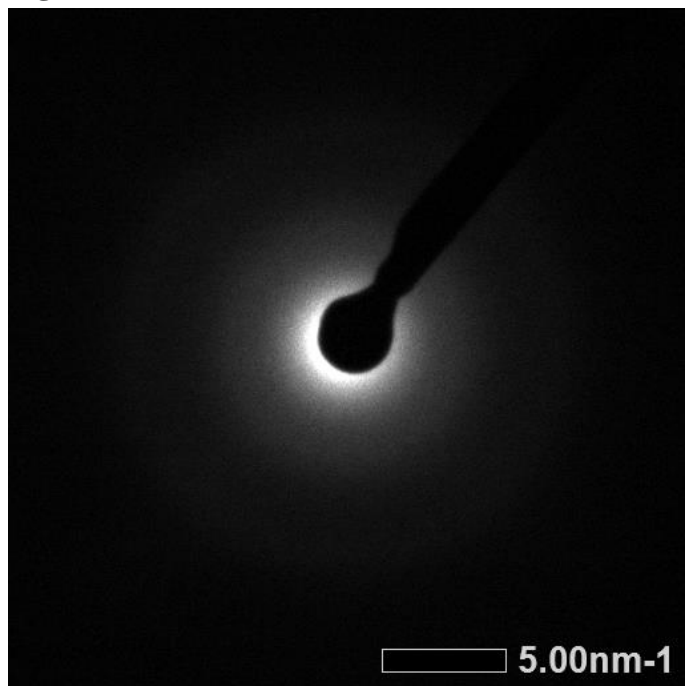

Halo-like electron diffraction pattern of amorphous  $a_g\text{ZIF-62}_{\text{nP}}$ .

**Fig. S23.**

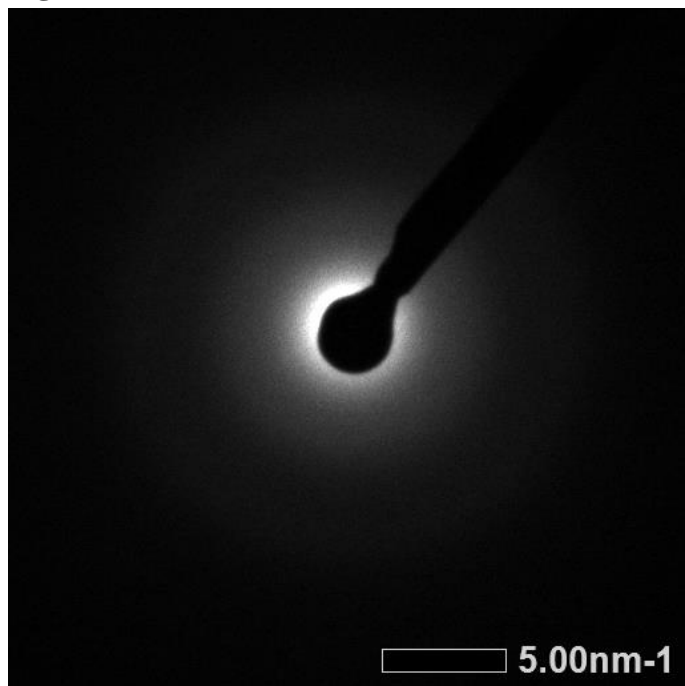

Halo-like electron diffraction pattern of amorphous  $a_g\text{ZIF-62}_p$ .

**Fig. S24.**

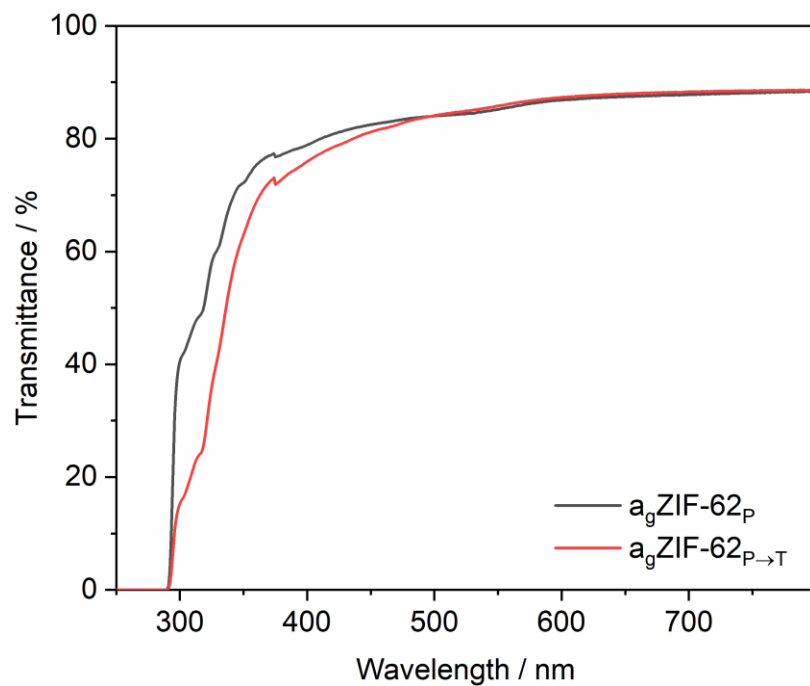

UV-vis transmittance spectra of  $a_g\text{ZIF-62}_P$  and  $a_g\text{ZIF-62}_{P \rightarrow T}$ , tempered for 4 hours.

Fig. S25.

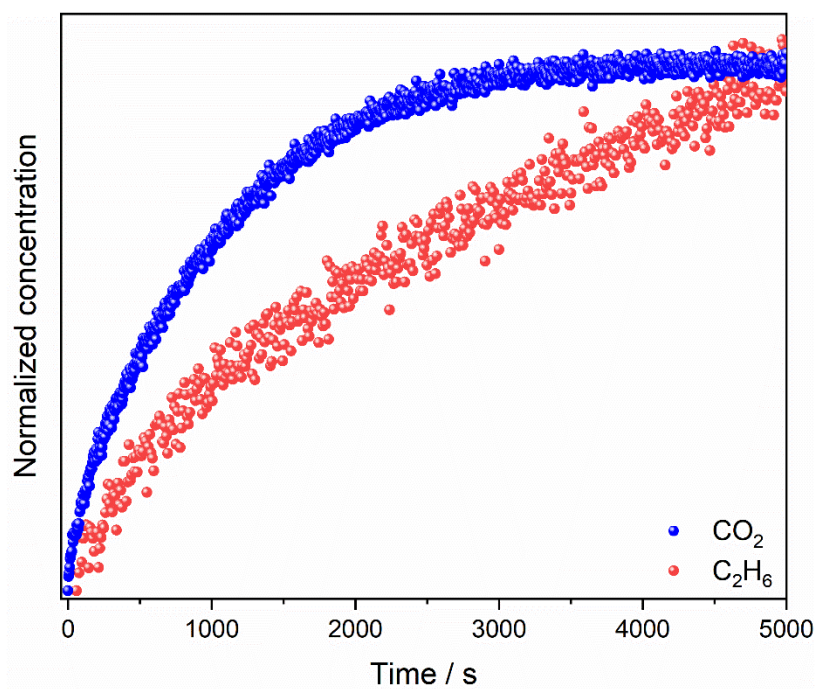

Normalized kinetic gas uptake curves for 0-40 mbar CO<sub>2</sub> and 0-200 mbar ethane in a<sub>g</sub>ZIF-62<sub>nP→T</sub>, tempered in the inert Ar atmosphere.

**Fig. S26.**

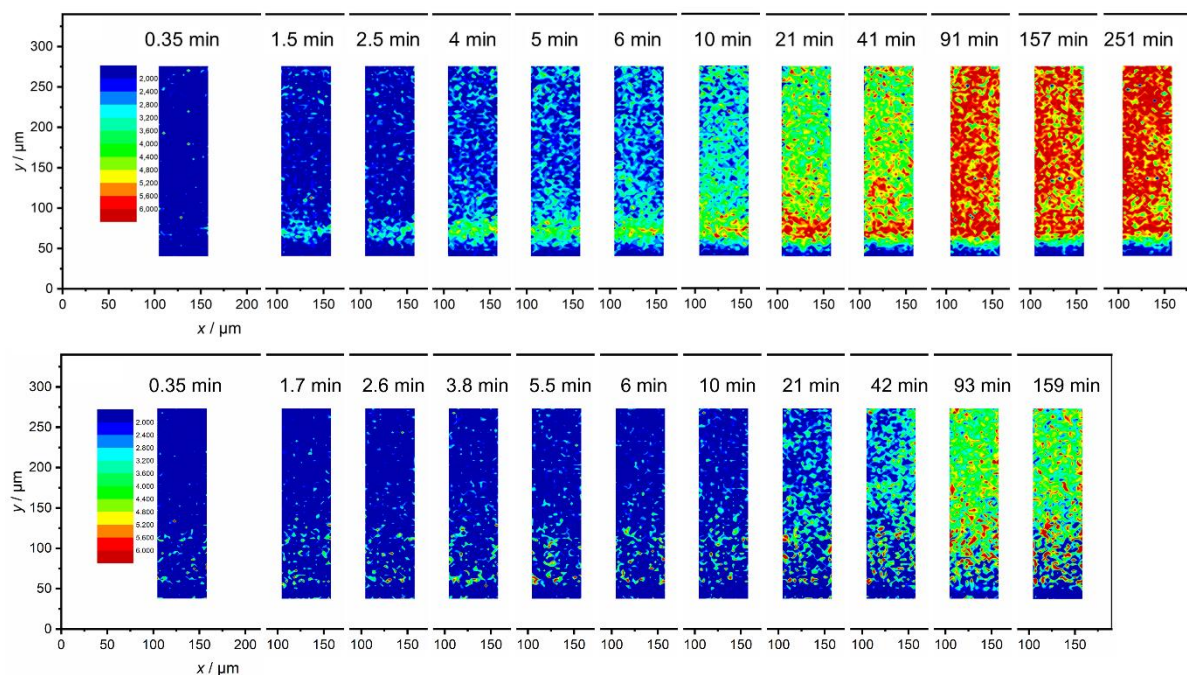

A comparison of guest concentration mapping upon CO<sub>2</sub> uptake in agZIF-62P (top) and agZIF-62P-T (bottom) on the edge of the glass shards (blue color means relatively low CO<sub>2</sub> concentration and the gradient to red color with high CO<sub>2</sub> concentration).

Fig. S27.

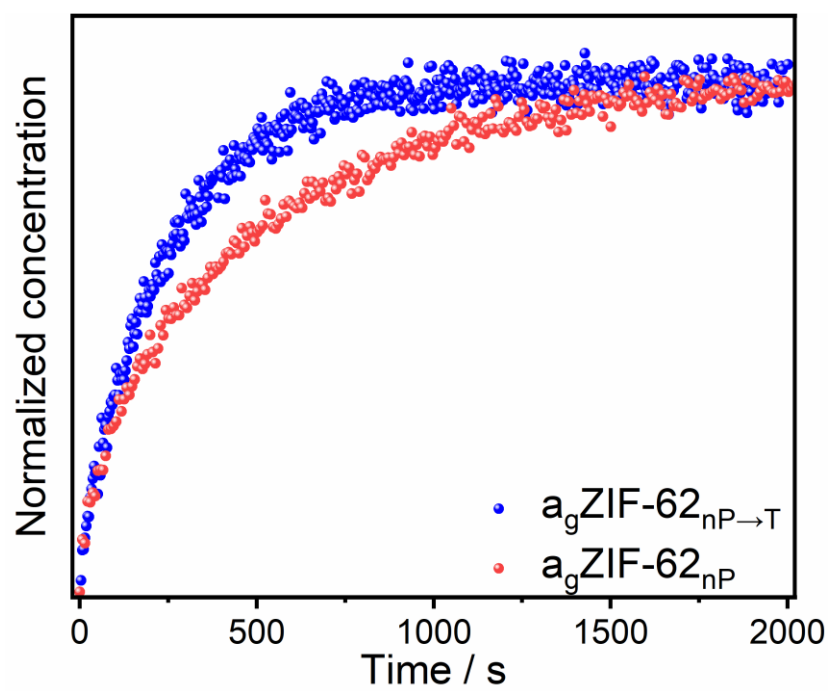

Normalized kinetic gas uptake curves for 0-40 mbar CO<sub>2</sub> in  $a_g\text{ZIF-62}_{nP}$  and  $a_g\text{ZIF-62}_{nP \rightarrow T}$ , tempered in the air atmosphere.

**Fig. S28.**

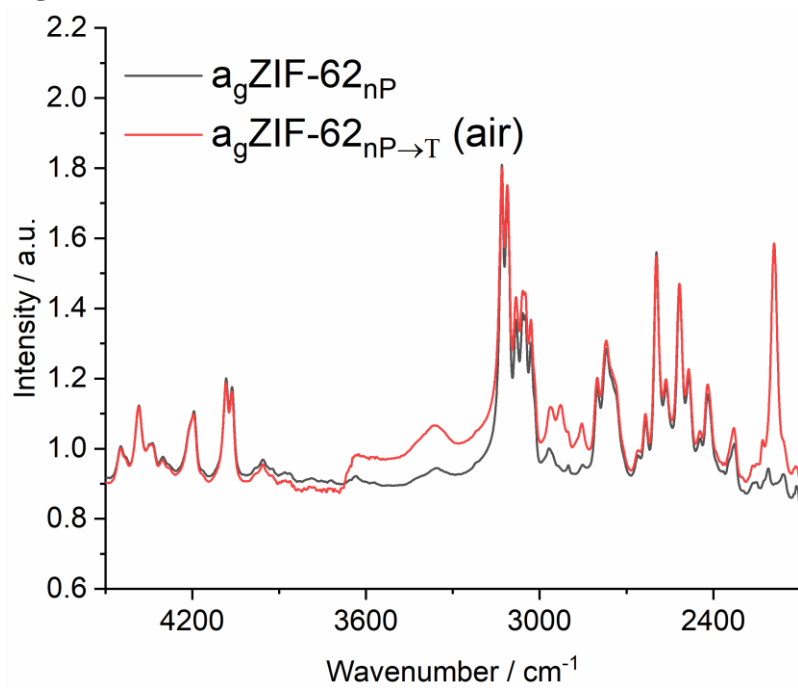

IR spectrum of a<sub>g</sub>ZIF-62<sub>nP</sub> and a<sub>g</sub>ZIF-62<sub>nP→T</sub>, tempered in air.

Fig. S29.

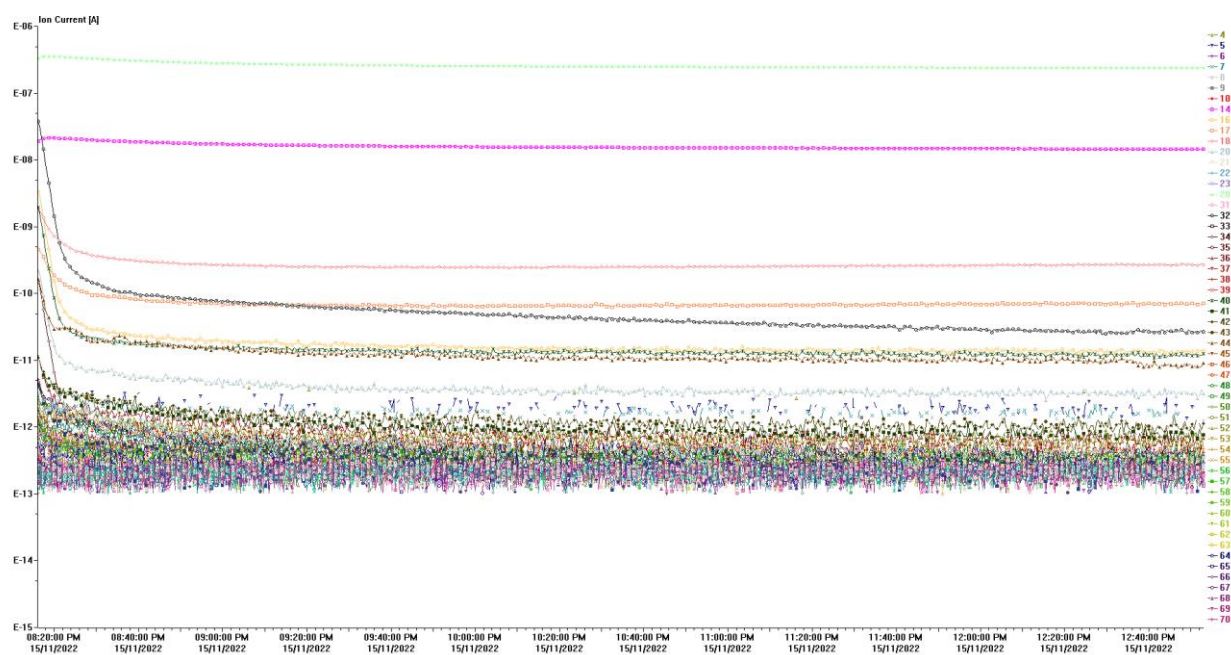

Mass spectrometry data for a<sub>g</sub>ZIF-62<sub>nP</sub>→<sub>T</sub> tempering.



**Table S1.**

| Tempering (min)           | Before tempering |       |       |       |       | After tempering |                |                |                |                |
|---------------------------|------------------|-------|-------|-------|-------|-----------------|----------------|----------------|----------------|----------------|
|                           | 10               | 30    | 60    | 120   | 240   | 10              | 30             | 60             | 120            | 240            |
| Area (mm <sup>2</sup> )   | 0,822            | 0,586 | 0,572 | 0,751 | 0,385 | 0,788           | 0,541          | 0,530          | 0,698          | 0,354          |
| Thickness (mm)            | 0,21             | 0,21  | 0,24  | 0,22  | 0,21  | 0,20            | 0,20           | 0,22           | 0,2            | 0,19           |
| Volume (mm <sup>3</sup> ) | 0,172            | 0,123 | 0,137 | 0,165 | 0,081 | 0,158           | 0,108          | 0,117          | 0,140          | 0,067          |
| Volume loss (%)           |                  |       |       |       |       | 8,25<br>±0,58   | 12,08<br>±0,48 | 15,06<br>±1,96 | 15,51<br>±0,93 | 16,81<br>±1,18 |

Geometrical parameters and volume loss calculated for a<sub>g</sub>ZIF-62<sub>P→T</sub> samples.

**Video S1.**

Exploding of the as-synthesized, not properly cleaned ZIF-62 crystal upon melting in Ar atmosphere. The decomposition of DMF and residuals leads to the explosion, as they act as blowing agents.

**Video S2.**

Melting a large, properly cleaned and dried ZIF-62 crystal in the inert Ar atmosphere. It is held at the melting point ( $T_m = 450\text{ }^\circ\text{C}$ ) for a long time. The pore collapse is visible through shrinking of the melt.

**Video S3.**

Melting smaller ZIF-62 crystals in the inert Ar atmosphere and keeping it at  $480\text{ }^\circ\text{C}$  above  $T_m$  to obtain  $a_g\text{ZIF-62}_{nP}$  and visualize the surface energy of the liquid and further to droplet formation better.

**Video S4.**

Tempering of  $a_g\text{ZIF-62}_{nP}$  at  $400\text{ }^\circ\text{C}$  (above  $T_g = 322\text{ }^\circ\text{C}$ ) in the inert Ar atmosphere to obtain a controlled pore-collapse in  $a_g\text{ZIF-62}_{nP\rightarrow T}$ . The shrinking is obvious.

**Video S5.**

Tempering of a shard of  $a_g\text{ZIF-62}_P$  at  $400\text{ }^\circ\text{C}$  (above  $T_g = 322\text{ }^\circ\text{C}$ ) in the inert Ar atmosphere to obtain a controlled pore-collapse in  $a_g\text{ZIF-62}_{P\rightarrow T}$ . The shrinking is obvious.

**Extended data figure 1.**

The statistical values of the interatomic distances in a<sub>g</sub>ZIF-62<sub>nP</sub> obtained through HR-TEM with blue lines corresponding to the distance measured.

**Extended data figure 2.**

The statistical values of the interatomic distances in a<sub>g</sub>ZIF-62<sub>P</sub> obtained through HR-TEM with blue lines corresponding to the distance measured.
